# Supplementary material for: miRNome landscape analysis reveals a 30 miRNA core in retinoblastoma
Source: BMC Cancer. 2017 Jul 1;17:458. doi: 10.1186/s12885-017-3421-3 (PMC5493862; doi:10.1186/s12885-017-3421-3)
Supplement: Supplementary file 3 — Analysis of target genes, pathways, cellular processes and miRNAs located in lost regions. (XLSX 148 kb) [file 12885_2017_3421_MOESM3_ESM.xlsx]

## Sheet: 182 ca target genes
182 target mRNA for 30 miRNA core related to cancer
FZD7
BRAF
FGF12
GSK3B
PRKCA
DVL3
STAT3
PDGFRA
WNT16
FZD5
TGFBR1
ERBB2
GNG13
MET
ADCY1
PTGER4
ROCK1
LAMA3
RAC2
FGF14
GNG11
SMAD2
CBL
CXCR4
NRAS
CRKL
STK4
GNAS
APC
CRK
RUNX1
PIK3CB
PTCH1
CUL2
TCF7L2
WNT5A
CTBP1
HHIP
ZBTB16
PIK3R2
PIK3R5
CDK2
GNA13
BAX
GLI2
ROCK2
TCF7L1
BDKRB2
ARNT
ETS1
FGF10
SMAD3
RARB
BCL2
CDKN1B
WNT2B
BIRC5
RALBP1
WNT4
CXCL12
WNT3
RASGRP2
IGF1R
GNAI3
GNB1
RHOA
APPL1
FZD8
KRAS
CDK6
TCEB1
FZD3
PML
TPM3
VHL
EPAS1
PTGER3
TP53
MITF
PLCB3
IKBKB
PTK2
LAMC3
GNA11
CBLB
ITGAV
PLCB1
CDH1
FZD4
RUNX1T1
MAPK9
PIK3R3
SMAD4
CTNNB1
MSH6
AXIN2
SKP2
HIF1A
E2F3
MAPK8
TRAF6
PGF
EDNRB
MMP9
GLI3
DAPK1
CSF3R
GNG7
KIT
PTGS2
PIK3R1
RB1
SOS1
PIK3CG
FGF9
HDAC2
PRKX
RAC1
FGF2
CDC42
RARA
CASP9
PLCG2
FZD1
FGF5
PRKCB
MAX
FAS
IGF1
TGFB2
EP300
GNAQ
NKX3-1
BCL2L1
AKT3
PIAS2
CTNNA3
WNT3A
PIK3CA
LEF1
ADCY8
MECOM
BIRC3
RALB
SLC2A1
GNG4
EDNRA
RASGRP3
RASSF1
CYCS
WNT9B
SUFU
FGFR2
ITGA6
SHH
RELA
TCF7
PTEN
FGFR1
FOXO1
MAPK1
CREBBP
TRAF3
ADCY9
ADCY4
JUP
TGFBR2
PPARD
MDM2
WNT9A
ABL1
STK36
GNB5
GNG3
CCDC6
PDGFRB
XIAP
EGLN1
COL4A1
PDGFA
ADCY6
PIK3R2

## Sheet: 48 tumor supressors
48 tumor suppressors target genes of 30 miRNA core
APC
FAS
RHOA
CDH1
RUNX1
BAX
CBL
PTEN
RB1
RARB
NKX3-1
CDK2
SKP2
CDK6
CDKN1B
CREBBP
DAPK1
E2F3
EDNRB
EPAS1
ITGAV
HIF1A
IGF1
JUP
SMAD2
SMAD4
MAX
PLCB3
FOXO1
GSK3B
PML
CXCL12
PRKCB
MAPK9
PTCH1
AXIN2
CTNNA3
CUL2
EGLN1
RASSF1
STAT3
SUFU
TCF7L2
TGFBR2
TP53
VHL
WNT5A
ZBTB16

## Sheet: 59 significant pathways
Significant pathways from target analysis of 30 miRNA core
#	KEGG pathway	p-value	#genes
1	Glycosphingolipid biosynthesis - lacto and neolacto series (hsa00601)	1.85565e-16	15
2	Hippo signaling pathway (hsa04390)	2.58363e-09	82
3	Signaling pathways regulating pluripotency of stem cells (hsa04550)	1.17575e-08	78
4	Proteoglycans in cancer (hsa05205)	1.08946e-07	97
5	Adherens junction (hsa04520)	2.47862e-07	46
6	Thyroid hormone signaling pathway (hsa04919)	1.27228e-06	63
7	Axon guidance (hsa04360)	1.21017e-05	65
8	Pathways in cancer (hsa05200)	1.21017e-05	182
9	Ubiquitin mediated proteolysis (hsa04120)	3.03031e-05	76
10	Wnt signaling pathway (hsa04310)	3.74656e-05	73
11	TGF-beta signaling pathway (hsa04350)	8.4922e-05	39
12	FoxO signaling pathway (hsa04068)	9.10075e-05	68
13	Colorectal cancer (hsa05210)	9.50704e-05	39
14	Renal cell carcinoma (hsa05211)	0.000131313	40
15	cGMP-PKG signaling pathway (hsa04022)	0.000131313	85
16	Cholinergic synapse (hsa04725)	0.000145722	58
17	Endocrine and other factor-regulated calcium reabsorption (hsa04961)	0.000150448	26
18	Endometrial cancer (hsa05213)	0.000207744	32
19	Mucin type O-Glycan biosynthesis (hsa00512)	0.000245259	15
20	Pancreatic cancer (hsa05212)	0.000311063	35
21	Viral carcinogenesis (hsa05203)	0.000408173	74
22	Transcriptional misregulation in cancer(hsa05202)	0.000408173	88
23	Arrhythmogenic right ventricular cardiomyopathy (ARVC) (hsa05412)	0.000638169	35
24	Prostate cancer (hsa05215)	0.000638169	50
25	Chronic myeloid leukemia (hsa05220)	0.000694763	39
26	Ras signaling pathway (hsa04014)	0.000694763	100
27	Sphingolipid signaling pathway (hsa04071)	0.000805191	57
28	HTLV-I infection (hsa05166)	0.0010481	119
29	AMPK signaling pathway (hsa04152)	0.0011691	62
30	Estrogen signaling pathway (hsa04915)	0.00148025	43
31	MAPK signaling pathway (hsa04010)	0.00153491	114
32	Thyroid hormone synthesis (hsa04918)	0.00244768	34
33	Phosphatidylinositol signaling system (hsa04070)	0.0026478	37
34	Lysine degradation (hsa00310)	0.00302398	21
35	Acute myeloid leukemia (hsa05221)	0.00312645	32
36	Oxytocin signaling pathway (hsa04921)	0.00476362	74
37	Adrenergic signaling in cardiomyocytes(hsa04261)	0.00516943	65
38	Endocytosis (hsa04144)	0.00516943	96
39	Rap1 signaling pathway (hsa04015)	0.00516943	92
40	Hepatitis B (hsa05161)	0.00653778	64
41	Basal cell carcinoma (hsa05217)	0.00904077	31
42	Bacterial invasion of epithelial cells (hsa05100)	0.00972414	40
43	Glutamatergic synapse (hsa04724)	0.0115827	52
44	PI3K-Akt signaling pathway (hsa04151)	0.0158697	138
45	Circadian rhythm (hsa04710)	0.0210809	19
46	Aldosterone-regulated sodium reabsorption(hsa04960)	0.0210809	23
47	Neurotrophin signaling pathway (hsa04722)	0.0210809	57
48	ErbB signaling pathway (hsa04012)	0.0216305	42
49	Type II diabetes mellitus (hsa04930)	0.0222319	27
50	Melanoma (hsa05218)	0.0232907	36
51	Non-small cell lung cancer (hsa05223)	0.024413	28
52	N-Glycan biosynthesis (hsa00510)	0.0256517	21
53	Glioma (hsa05214)	0.0306086	30
54	Melanogenesis (hsa04916)	0.0343666	48
55	Focal adhesion (hsa04510)	0.0402485	89
56	Morphine addiction (hsa05032)	0.045394	38
57	Insulin signaling pathway (hsa04910)	0.0485188	63
58	Retrograde endocannabinoid signaling(hsa04723)	0.0486902	45
59	Calcium signaling pathway (hsa04020)	0.0497667	74

## Sheet: miRNAs gender dif
Differential miRNAs by gender from cluster P analysis (without 142 present in all cases).
Transcript ID(Array Design)	Male	Female
	Median signal	Median signal
hsa-miR-1909-5p	2.78235	4.78218
hsa-miR-4436b-5p	2.9182	5.50112
hsa-miR-4695-3p	2.62987	4.92762
hsa-miR-6741-5p	2.62876	4.38887
hsa-miR-6754-3p	2.3416	4.91024
hsa-miR-6870-5p	2.3992	4.88372
hsa-miR-6877-3p	2.41674	5.98983
hsa-miR-6885-3p	1.43785	2.85689
hsa-miR-7109-5p	2.76567	4.06215
hsa-miR-7114-5p	2.13841	4.78854
hsa-let-7a-5p	9.11344	1.168
hsa-let-7e-5p	9.78441	1.37895
hsa-miR-103a-3p	11.9013	1.33143
hsa-miR-106a-5p	11.4822	2.80947
hsa-miR-106b-5p	10.1969	2.51314
hsa-miR-107	11.4818	1.00109
hsa-miR-125a-5p	8.71132	1.35125
hsa-miR-130b-3p	9.32589	3.39158
hsa-miR-151a-5p	8.34527	1.15143
hsa-miR-15b-5p	9.43814	1.19624
hsa-miR-16-5p	12.2981	1.70468
hsa-miR-17-5p	11.8159	2.76429
hsa-miR-181a-5p	9.12923	3.32349
hsa-miR-182-5p	11.6221	2.33438
hsa-miR-183-5p	9.35941	1.89655
hsa-miR-191-5p	10.505	2.67769
hsa-miR-19b-3p	9.59673	1.42485
hsa-miR-20a-5p	10.5967	1.70194
hsa-miR-23b-3p	8.84612	1.27982
hsa-miR-25-3p	9.53818	1.26877
hsa-miR-26a-5p	10.521	1.42654
hsa-miR-30c-5p	7.99704	1.69126
hsa-miR-361-5p	8.7962	2.16622
hsa-miR-425-5p	8.32536	1.34941
hsa-miR-93-5p	11.1472	3.08523
hsa-miR-99b-5p	9.46381	2.06424

## Sheet: 68 sig. path. gender
Pathways related to differential miRNAs between gender
#	KEGG pathway	p-value	#genes	#miRNAs
5	Regulation pluripotency SC	3.08335e-07	90	30
7	Thyroid hormone	2.04745e-05	76	33
15	Estrogen	0.000177078	59	32
24	Oxytocin	0.00134764	94	33
30	Vasopressin	0.00238255	31	28
51	Insulin	0.0100365	82	32
62	Circadian rhythm	0.028425	23	28
64	Progesterone	0.0327958	53	27
65	Type II diabetes mellitus	0.0445345	29	22
1	Fatty acid biosynthesis (hsa00061)	8.65875e-12	10	15
2	Proteoglycans in cancer (hsa05205)	5.10232e-10	130	32
3	Pathways in cancer (hsa05200)	8.49969e-08	235	34
4	TGF-beta signaling pathway (hsa04350)	3.08335e-07	53	29
6	Axon guidance (hsa04360)	7.76311e-07	84	29
8	FoxO signaling pathway (hsa04068)	4.46642e-05	88	31
9	Gap junction (hsa04540)	6.55458e-05	58	34
10	Adrenergic signaling in cardiomyocytes(hsa04261)	9.86939e-05	88	32
11	Wnt signaling pathway (hsa04310)	0.000134792	89	30
12	Rap1 signaling pathway (hsa04015)	0.000134792	128	32
13	Ras signaling pathway (hsa04014)	0.000152584	132	31
14	Glutamatergic synapse (hsa04724)	0.000152584	68	31
16	mTOR signaling pathway (hsa04150)	0.000247747	44	30
17	Prostate cancer (hsa05215)	0.000316196	59	31
18	Prion diseases (hsa05020)	0.000350027	14	17
19	PI3K-Akt signaling pathway (hsa04151)	0.000464968	191	33
20	Glioma (hsa05214)	0.000583385	41	29
21	ErbB signaling pathway (hsa04012)	0.000637151	58	30
22	Colorectal cancer (hsa05210)	0.000787432	43	26
23	Phosphatidylinositol signaling system (hsa04070)	0.00105302	49	30
25	Mucin type O-Glycan biosynthesis (hsa00512)	0.00177243	19	19
26	Adherens junction (hsa04520)	0.00180425	49	32
27	Neurotrophin signaling pathway (hsa04722)	0.00180425	77	32
28	Sphingolipid signaling pathway (hsa04071)	0.00190716	72	29
29	Melanoma (hsa05218)	0.00191989	47	29
31	Melanogenesis (hsa04916)	0.00261422	62	27
32	Renal cell carcinoma (hsa05211)	0.00261422	44	29
33	Retrograde endocannabinoid signaling(hsa04723)	0.00261422	60	31
34	Transcriptional misregulation in cancer(hsa05202)	0.00261422	101	34
35	Ubiquitin mediated proteolysis (hsa04120)	0.00273861	85	33
36	Regulation of actin cytoskeleton (hsa04810)	0.00328432	124	31
37	N-Glycan biosynthesis (hsa00510)	0.00348679	24	24
38	AMPK signaling pathway (hsa04152)	0.00418738	75	31
39	Focal adhesion (hsa04510)	0.00494147	118	31
40	Arrhythmogenic right ventricular cardiomyopathy (ARVC) (hsa05412)	0.00549998	45	27
41	Platelet activation (hsa04611)	0.00549998	73	32
42	Dopaminergic synapse (hsa04728)	0.00549998	76	33
43	Lysine degradation (hsa00310)	0.00714465	27	29
44	cGMP-PKG signaling pathway (hsa04022)	0.00714465	96	33
45	Non-small cell lung cancer (hsa05223)	0.00750397	35	30
46	Pancreatic cancer (hsa05212)	0.00767476	42	30
47	Acute myeloid leukemia (hsa05221)	0.00819232	35	26
48	Endometrial cancer (hsa05213)	0.00898313	35	29
49	Long-term potentiation (hsa04720)	0.00920934	43	29
50	MAPK signaling pathway (hsa04010)	0.0096925	140	35
52	Morphine addiction (hsa05032)	0.0102555	56	30
53	Apoptosis (hsa04210)	0.0111684	53	28
54	Choline metabolism in cancer (hsa05231)	0.0113077	63	32
55	Biotin metabolism (hsa00780)	0.0123969	2	3
56	Chronic myeloid leukemia (hsa05220)	0.0123969	45	29
57	Hippo signaling pathway (hsa04390)	0.0132142	92	31
58	Endocytosis (hsa04144)	0.0143421	115	31
59	GABAergic synapse (hsa04727)	0.0160108	48	30
60	Hepatitis B (hsa05161)	0.0223812	80	32
61	p53 signaling pathway (hsa04115)	0.0269178	42	29
63	Glycosaminoglycan biosynthesis - heparan sulfate / heparin (hsa00534)	0.0327958	14	17
66	Hedgehog signaling pathway (hsa04340)	0.0445345	32	25
67	Basal cell carcinoma (hsa05217)	0.0482116	34	26
68	Gastric acid secretion (hsa04971)	0.0482978	44	28
			4523

## Sheet: sig. path Branches V2 and V3
Significant pathways from Cluster V2 target analysis.
#	KEGG pathway	p-value	#genes	#miRNAs
1	Proteoglycans in cancer (hsa05205)	6.19948e-09	77	27
2	ErbB signaling pathway (hsa04012)	1.39997e-05	38	22
3	Prostate cancer (hsa05215)	0.00141953	40	21
4	Choline metabolism in cancer (hsa05231)	0.00188332	43	20
5	Signaling pathways regulating pluripotency of stem cells (hsa04550)	0.00549801	50	21
6	Pathways in cancer (hsa05200)	0.0190398	121	28
7	Endometrial cancer (hsa05213)	0.0256238	24	19
		Total	393
Significant pathways from Cluster V3 target analysis
#	KEGG pathway	p-value	#genes	#miRNAs
1	Proteoglycans in cancer (hsa05205)	1.10114e-10	102	27
2	ErbB signaling pathway (hsa04012)	6.4593e-09	55	26
3	Renal cell carcinoma (hsa05211)	1.90271e-08	44	24
4	Prion diseases (hsa05020)	2.4815e-07	13	13
5	Hippo signaling pathway (hsa04390)	2.61458e-06	76	25
6	MAPK signaling pathway (hsa04010)	3.77837e-06	125	29
7	Axon guidance (hsa04360)	2.01208e-05	68	26
8	ECM-receptor interaction (hsa04512)	2.6339e-05	36	24
9	Gap junction (hsa04540)	2.6339e-05	46	24
10	Estrogen signaling pathway (hsa04915)	2.6339e-05	51	25
11	Glioma (hsa05214)	3.28795e-05	35	25
12	TGF-beta signaling pathway (hsa04350)	8.0971e-05	44	25
13	Adrenergic signaling in cardiomyocytes(hsa04261)	0.000150949	67	26
14	Prostate cancer (hsa05215)	0.000193077	49	23
15	Ras signaling pathway (hsa04014)	0.000193077	101	27
16	Signaling pathways regulating pluripotency of stem cells (hsa04550)	0.000194704	69	26
17	Focal adhesion (hsa04510)	0.000194704	100	27
18	Regulation of actin cytoskeleton (hsa04810)	0.000205131	103	26
19	Pathways in cancer (hsa05200)	0.000205131	180	26
20	Wnt signaling pathway (hsa04310)	0.000222046	66	27
21	FoxO signaling pathway (hsa04068)	0.000360552	67	24
22	HIF-1 signaling pathway (hsa04066)	0.000829061	55	24
23	Choline metabolism in cancer (hsa05231)	0.000898153	54	26
24	mTOR signaling pathway (hsa04150)	0.00172069	35	24
25	Rap1 signaling pathway (hsa04015)	0.0017731	96	27
26	Long-term potentiation (hsa04720)	0.00192623	38	28
27	Long-term depression (hsa04730)	0.00271459	31	19
28	Thyroid hormone signaling pathway (hsa04919)	0.00328254	54	26
29	PI3K-Akt signaling pathway (hsa04151)	0.00355014	146	27
30	Phosphatidylinositol signaling system (hsa04070)	0.00496476	39	22
31	Oxytocin signaling pathway (hsa04921)	0.0119433	73	26
32	Thyroid hormone synthesis (hsa04918)	0.0132395	32	23
33	GABAergic synapse (hsa04727)	0.0138082	38	24
34	AMPK signaling pathway (hsa04152)	0.0176201	59	24
35	Melanoma (hsa05218)	0.0203366	37	21
36	Adherens junction (hsa04520)	0.022971	38	23
37	Insulin signaling pathway (hsa04910)	0.0232676	64	23
38	Neurotrophin signaling pathway (hsa04722)	0.0232676	56	25
39	Oocyte meiosis (hsa04114)	0.0232676	54	26
40	Lysine degradation (hsa00310)	0.0337654	20	16
41	Cocaine addiction (hsa05030)	0.0391864	25	23
42	Sphingolipid signaling pathway (hsa04071)	0.0415649	53	24
43	mRNA surveillance pathway (hsa03015)	0.0443715	43	22
44	Ubiquitin mediated proteolysis (hsa04120)	0.0443715	57	25
45	cGMP-PKG signaling pathway (hsa04022)	0.0487656	70	26
		Total	2764

## Sheet: miRNAs located in lost regions
Undetectable miRs by Expression Microarrays (ExpMA) and located at
lost zones by Next Generation Sequencing (NGS).
Chromosome	Total miRs	Undetectable miRs in all Rb samples (Microarrays)	miRs undetectable by EMA and located at DNA lost zones by NGS*	% miRs lost and undetectable
1	230	85	13	15.29
2	144	63	17	26.98
3	128	44	10	22.73
4	77	37	18	48.65
5	94	36	6	16.67
6	92	33	9	27.27
7	103	33	5	15.15
8	112	51	15	29.41
9	110	34	4	11.76
10	91	49	6	12.24
11	150	52	3	5.77
12	106	35	5	14.29
13	57	17	5	29.41
14	154	61	7	11.48
15	79	28	1	3.57
16	90	31	0	0
17	172	61	5	8.2
18	43	23	8	34.78
19	213	96	3	3.13
20	61	25	1	4
21	28	10	0	0
22	69	20	0	0
X	168	70	3	4.29
Y	2	1	0	0
Total	2573	995	144	14.47

## Sheet: 65 significant pathways
Significant pathways from 144 absent miRNAs located in lost chromosome regions
#	KEGG pathway	p-value	#genes	#miRNAs
1	Proteoglycans in cancer	1.82611e-08	158	87
2	Axon guidance	1.41475e-07	104	86
4	Hippo signaling pathway (hsa04390)	9.65198e-06	120	85
8	Thyroid hormone	2.72213e-05	96	85				Cellular processes
12	Adrenergic signaling	0.000344842	111	87				Diferentiation	28
14	Prolactin	0.000423682	57	74				Proliferation/antiproliferation	8
15	FoxO signaling pathway (hsa04068)	0.000423682	105	84				Pathways in cancer	13
17	Signaling pathways regulating pluripotency of stem cells	0.000657692	107	85				Cellular adhesion	7
22	N-Glycan biosynthesis	0.00146825	35	50				Metabolism	6
24	Glioma	0.00163935	50	77				Infections	3
27	Choline metabolism	0.00240201	80	85				Hypoxia	1
30	Sphingolipid signaling	0.00311069	89	76
31	Amphetamine addiction	0.00406621	51	76
32	Glutamatergic synapse	0.00406621	86	81
38	Protein processing in ER	0.00679366	123	89
42	Long-term depression	0.00987814	48	72
43	Estrogen	0.00987814	71	84
47	Cocaine addiction	0.0118986	38	68
51	Glycosaminoglycan biosynthesis	0.0159214	10	20
52	Calcium signaling	0.0164861	128	88
58	Dopaminergic synapse	0.0248506	96	83
59	Circadian rhythm	0.0253501	26	59
60	Glycosphingolipid biosynthesis	0.0258823	21	41
61	Nicotine addiction	0.0305604	29	60
62	Dorso-ventral axis formation	0.0341889	23	59
63	Osteoclast differentiation (hsa04380)	0.0368446	94	77
66	Synaptic vesicle cycle	0.0451149	45	63
69	Cholinergic synapse	0.0469274	81	83
5	Pancreatic cancer (hsa05212)	2.17781e-05	57	75
7	Pathways in cancer (hsa05200)	2.50983e-05	289	96
13	Renal cell carcinoma (hsa05211)	0.000396316	54	81
18	Colorectal cancer (hsa05210)	0.000681332	52	78
28	Prostate cancer (hsa05215)	0.00240201	70	87
29	Endometrial cancer (hsa05213)	0.00256927	43	81
36	Non-small cell lung cancer (hsa05223)	0.00641492	45	73
37	Small cell lung cancer (hsa05222)	0.00641492	67	77
39	Central carbon metabolism in cancer (hsa05230)	0.00740164	51	78
44	Chronic myeloid leukemia (hsa05220)	0.0103199	57	79
54	Melanoma (hsa05218)	0.0216287	54	81
57	Acute myeloid leukemia (hsa05221)	0.0248506	43	73
64	AMPK signaling pathway (hsa04152)	0.0368446	90	79
6	TGF-beta signaling pathway (hsa04350)	2.17781e-05	65	79
11	Wnt signaling pathway (hsa04310)	0.000298414	108	84
19	PI3K-Akt signaling pathway (hsa04151)	0.000714107	247	93
20	ErbB signaling pathway (hsa04012)	0.000786419	69	86
33	Rap1 signaling pathway (hsa04015)	0.00413351	152	90
40	Phosphatidylinositol signaling system (hsa04070)	0.00817521	61	75
48	Ras signaling pathway (hsa04014)	0.0134134	156	92
50	mTOR signaling pathway (hsa04150)	0.0159001	48	78
3	Adherens junction (hsa04520)	3.05071e-06	63	79
16	Tight junction (hsa04530)	0.000423682	108	84
25	Regulation of actin cytoskeleton (hsa04810)	0.00184176	157	89
26	Focal adhesion (hsa04510)	0.00225303	153	91
49	Epithelial cell signaling in Helicobacter pylori infection (hsa05120)	0.0151409	53	66
55	Gap junction (hsa04540)	0.0240911	63	82
67	T cell receptor signaling pathway (hsa04660)	0.0451149	76	78
10	Endocytosis (hsa04144)	8.14861e-05	155	83
23	Ubiquitin mediated proteolysis (hsa04120)	0.00155103	103	78
41	mRNA surveillance pathway (hsa03015)	0.00987814	68	72
45	Lysine degradation (hsa00310)	0.0104568	36	75
53	RNA transport (hsa03013)	0.0184424	123	83
68	RNA degradation (hsa03018)	0.0469274	60	64
21	Bacterial invasion of epithelial cells (hsa05100)	0.00145903	61	76
56	Shigellosis (hsa05131)	0.0247738	47	68
70	Hepatitis B (hsa05161)	0.0469274	98	86
34	HIF-1 signaling	0.00560941	81	80
9	Arrhythmogenic right ventricular cardiomyopathy (ARVC) (hsa05412)	8.14861e-05	57	72
46	Type II diabetes mellitus (hsa04930)	0.0118986	39	62
65	Platelet activation (hsa04611)	0.0430586	91	82
			5652
